# Supplementary material for: Robust, Ultrathin, and Highly Sensitive Reduced Graphene Oxide/Silk Fibroin Wearable Sensors Responded to Temperature and Humidity for Physiological Detection
Source: PubMed Central journal article supplement — Biomacromolecules. 2023 Apr 19;24(6):2606–17. doi: 10.1021/acs.biomac.3c00106 (PMC10266372; doi:10.1021/acs.biomac.3c00106), 2023-04-19
Supplement: bm3c00106_si_001.pdf [file bm3c00106_si_001.pdf]

# **Robust, ultrathin, and highly sensitive reduced graphene oxide/silk fibroin wearable sensors responded to temperature and humidity for physiological detection**

*Hyeonho Cho<sup>a,†</sup>, Chanui Lee<sup>a,†</sup>, ChaBum Lee<sup>b</sup>, Sangmin Lee<sup>a</sup>, and Sunghan Kim<sup>a,\*</sup>*

<sup>a</sup> School of Mechanical Engineering, Chung-Ang University, Dongjak-gu, Seoul 06974, Korea

<sup>b</sup> J. Mike Walker '66 Department of Mechanical Engineering, Texas A&M University, College Station, Texas 77843-3123, USA

\* Corresponding Author E-mail: [sunghankim@cau.ac.kr](mailto:sunghankim@cau.ac.kr)

†Hyeonho Cho and Chanui Lee contributed equally to this work.

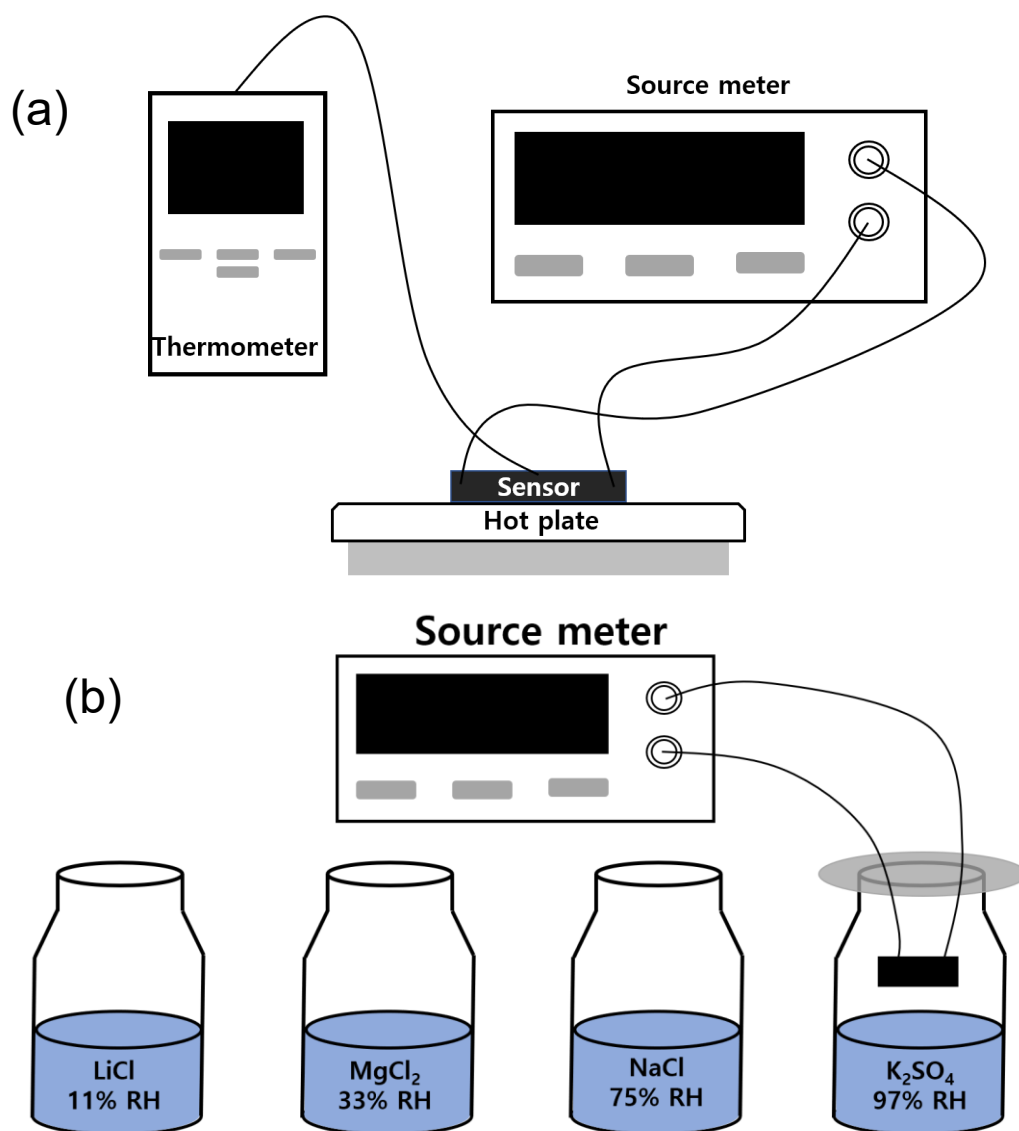

**Figure S1.** Schematic of the measurement methods used for the responsivity of a sensor: (a) varying the temperature and (b) varying the humidity.

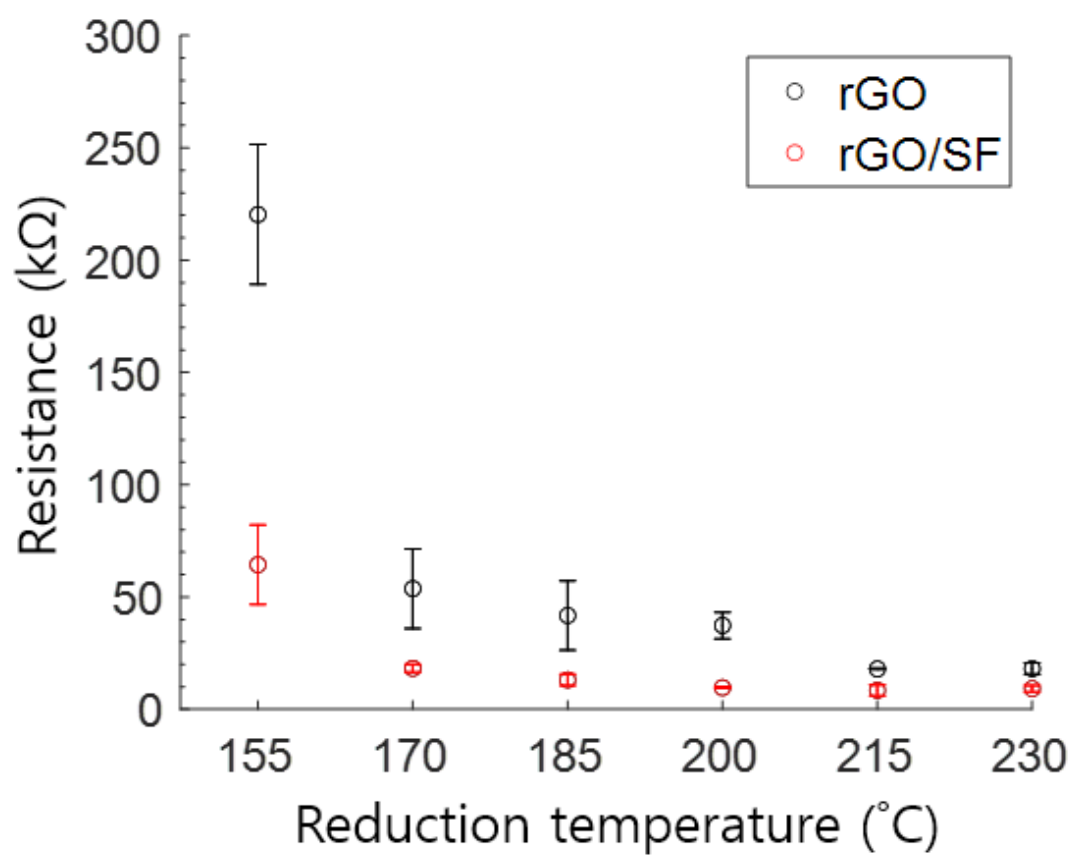

**Figure S2.** Resistance of rGO and rGO/SF sensors fabricated with different reduction temperatures.

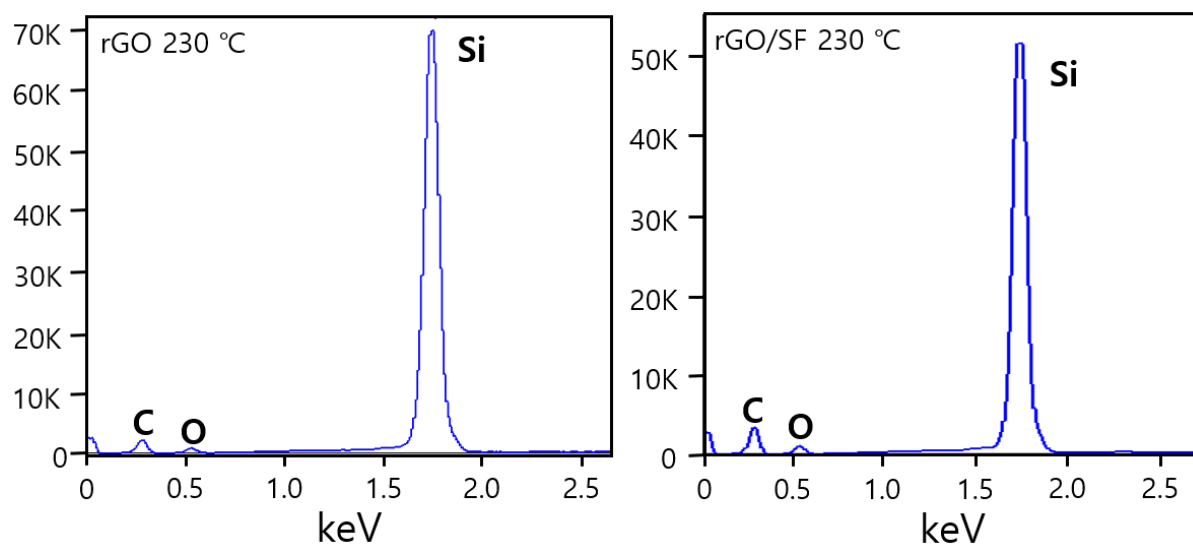

**Figure S3.** Representative EDS plots of rGO and rGO/SF films fabricated with a reduction temperature of 230 °C.

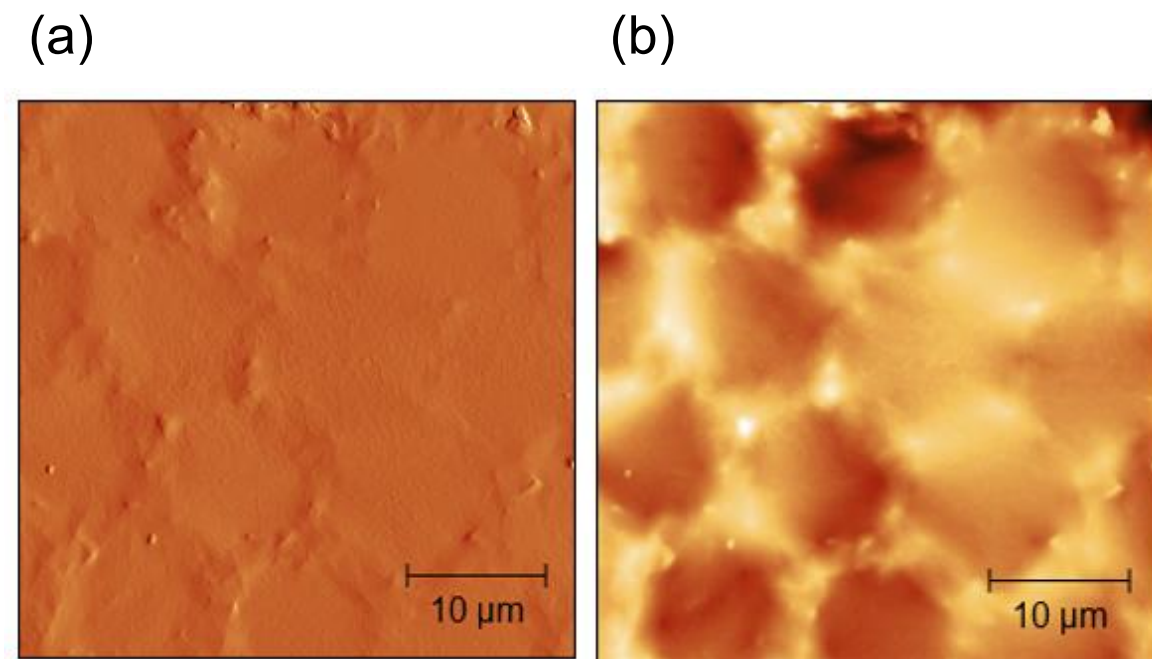

**Figure S4.** AFM images: (a) a force image and (b) a morphological image of an rGO/SF film scanned in the contact mode. The scale bars are 10 μm in length.

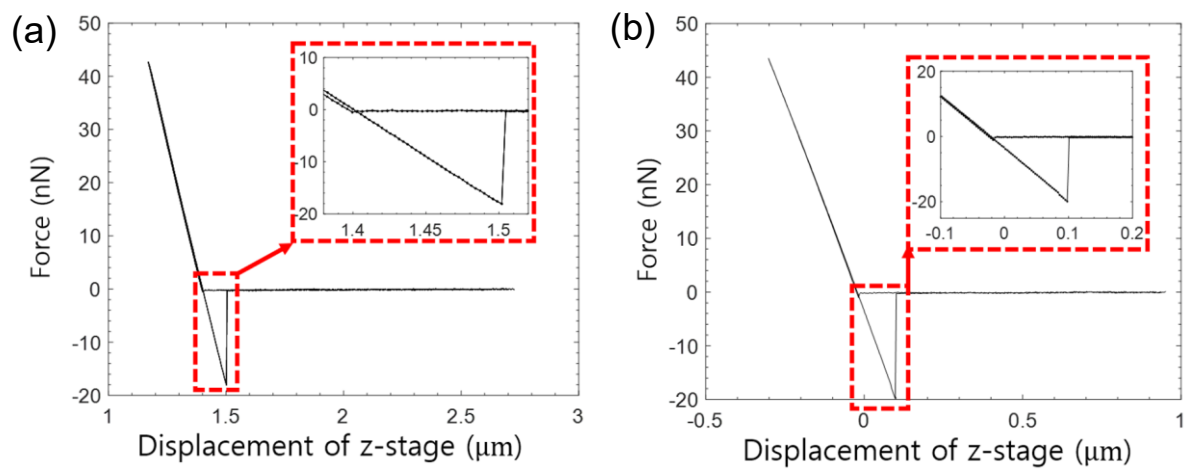

**Figure S5.** Force-displacement (FD) curves of the z-stage for (a) rGO and (b) rGO/SF films.

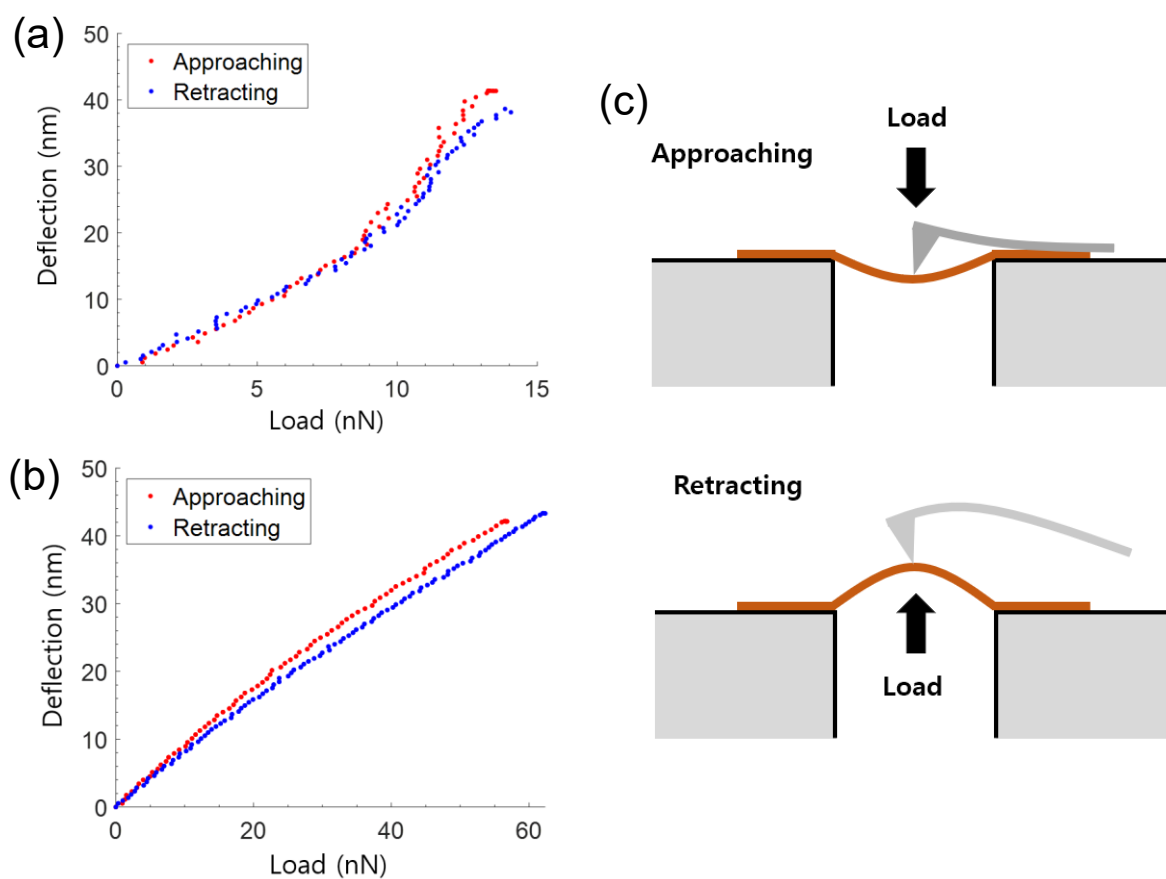

**Figure S6.** Load-deflection plots for (a) rGO and (b) rGO/SF films, constructed for (c) the measurement of the approaching and retracting directions.

(a)

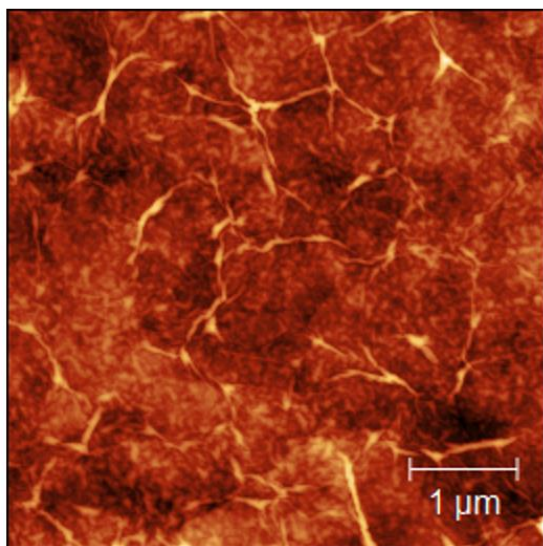Roughness ( $R_q$ ):  $3.25 \pm 0.51$  nm

(b)

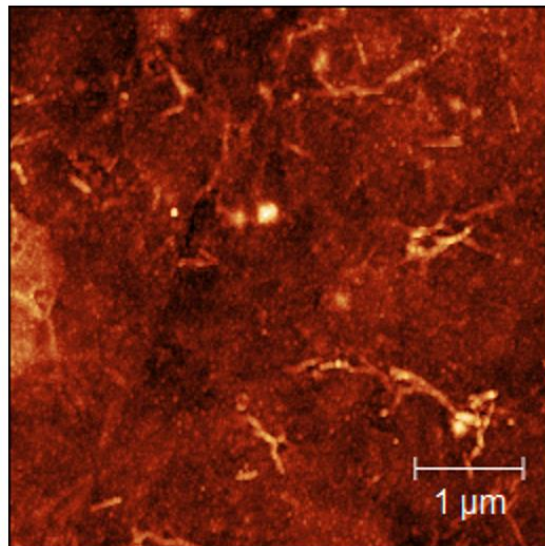Roughness ( $R_q$ ):  $3.06 \pm 0.69$  nm

(c)

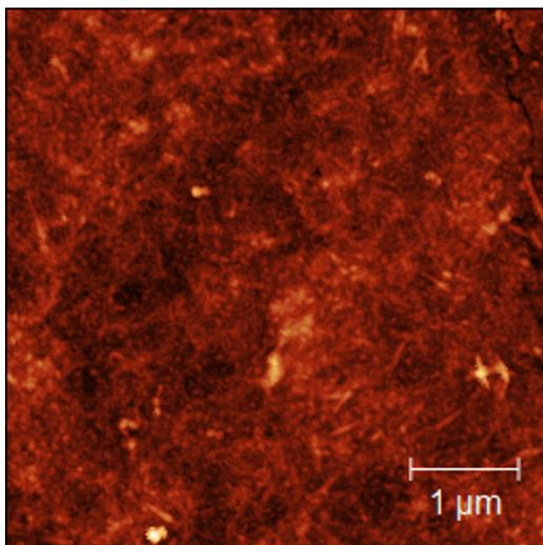Roughness ( $R_q$ ):  $4.68 \pm 1.02$  nm

(d)

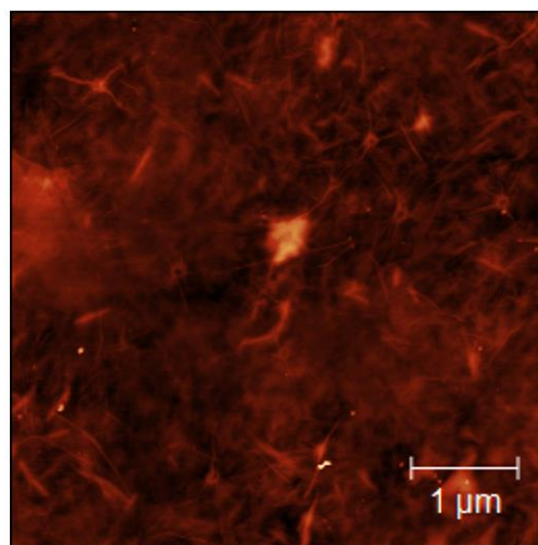Roughness ( $R_q$ ):  $2.80 \pm 0.93$  nm

**Figure S7.** Morphological AFM images of rGO films fabricated with reduction temperatures of (a) 155 and (b) 230 °C. Morphological AFM images of rGO/SF films fabricated with reduction temperatures of (c) 155 and (d) 230 °C.



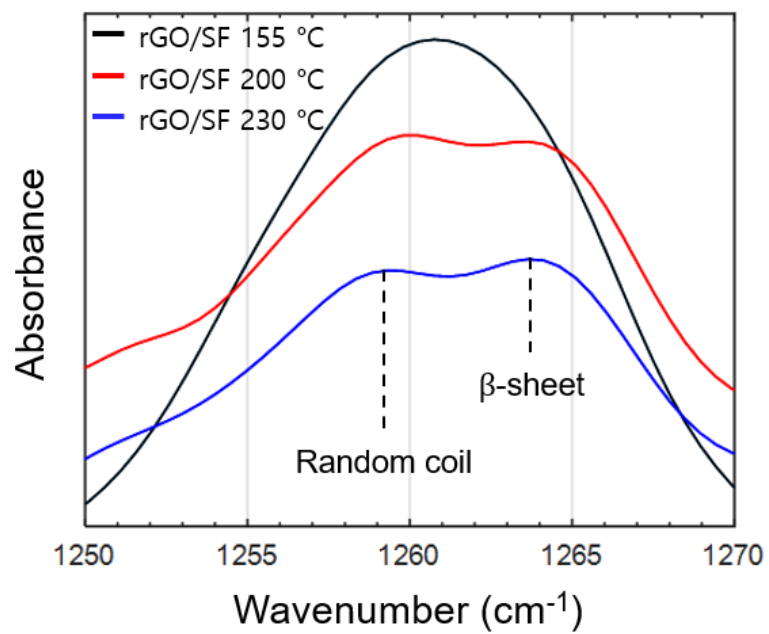

**Figure S8.** FTIR spectra of rGO/SF films fabricated with reduction temperatures of 155 (black), 200 (red), and 230 °C (blue).

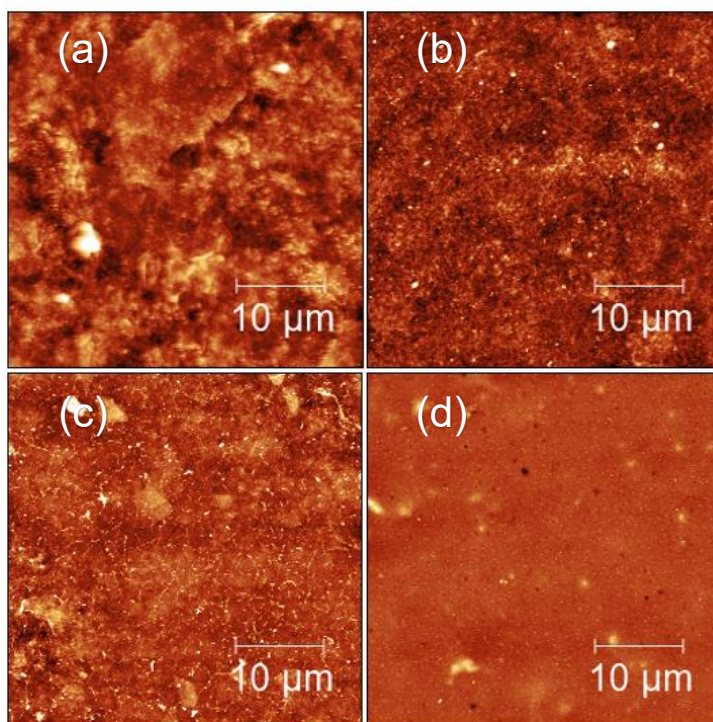

**Figure S9.** AFM images of (a) an rGO/SF film without an LbL structure (z-scale: 400 nm), (b) an rGO/SF film with an LbL structure (z-scale: 70 nm), (c) an rGO film (z-scale: 30 nm), and (d) an SF film (z-scale: 70 nm).

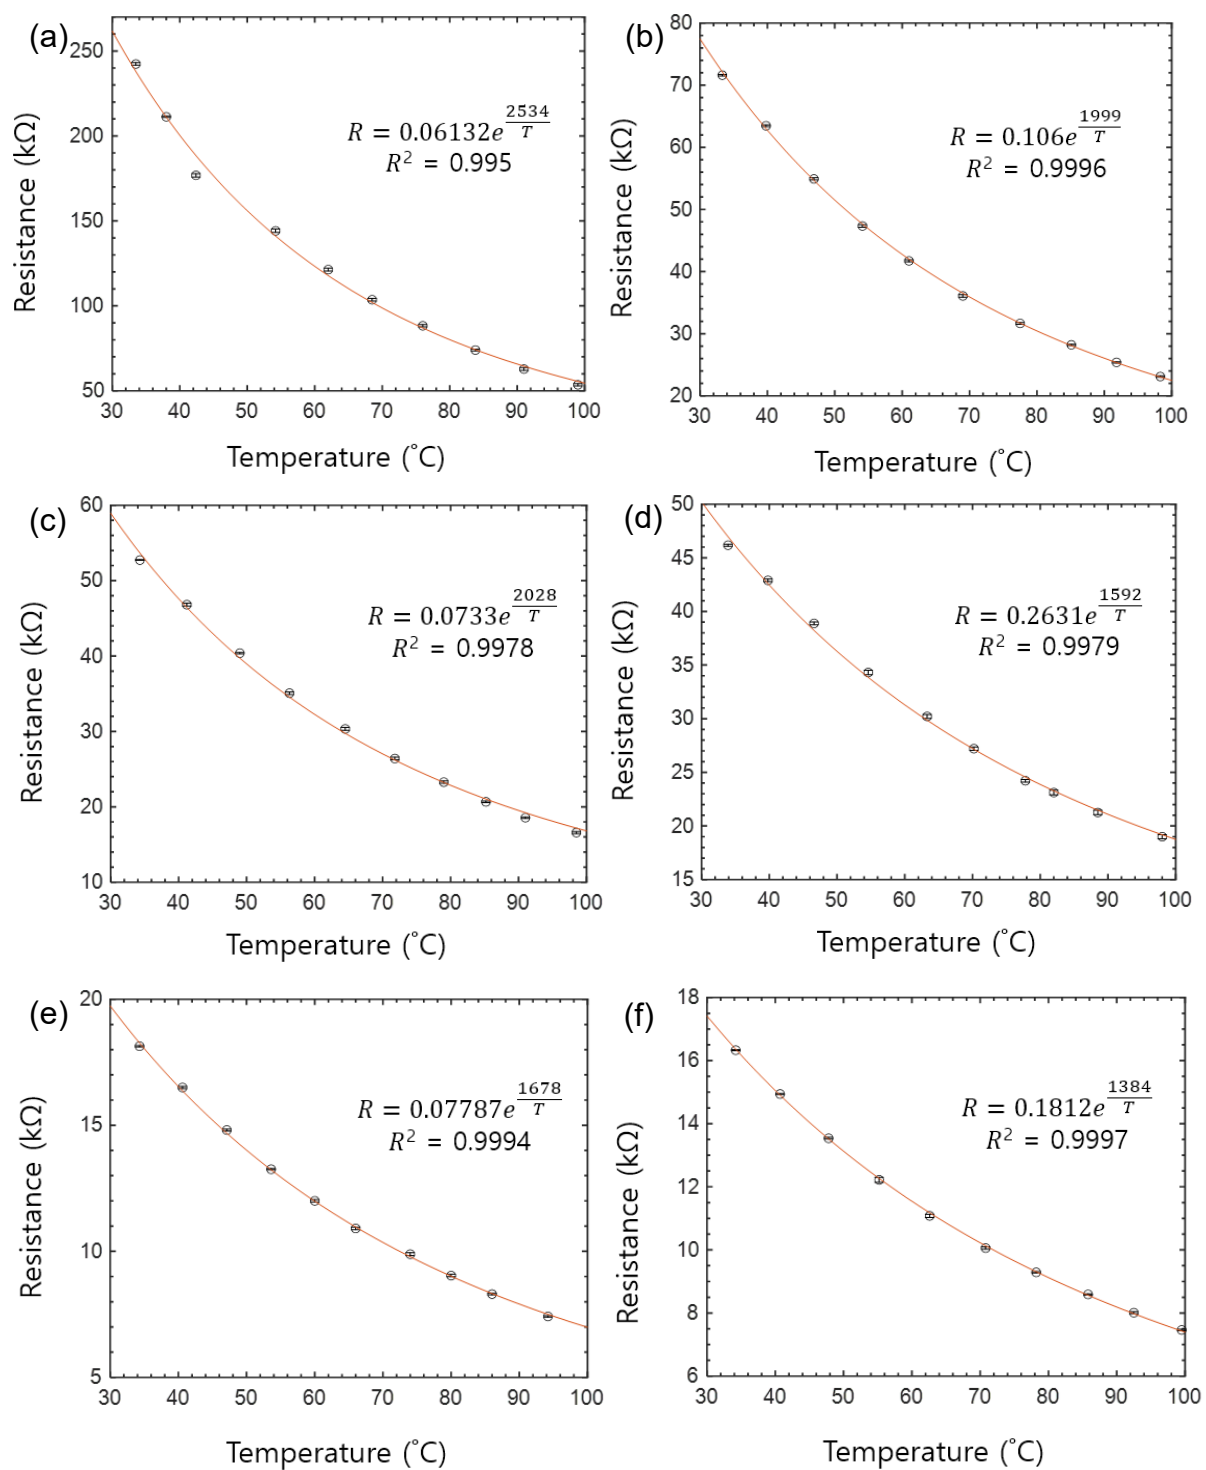

**Figure S10.** Resistance-temperature curves of rGO-sensor-based temperature sensors fabricated with reduction temperatures of (a) 155, (b) 170, (c) 185, (d) 200, (e) 215, and (f) 230 °C.

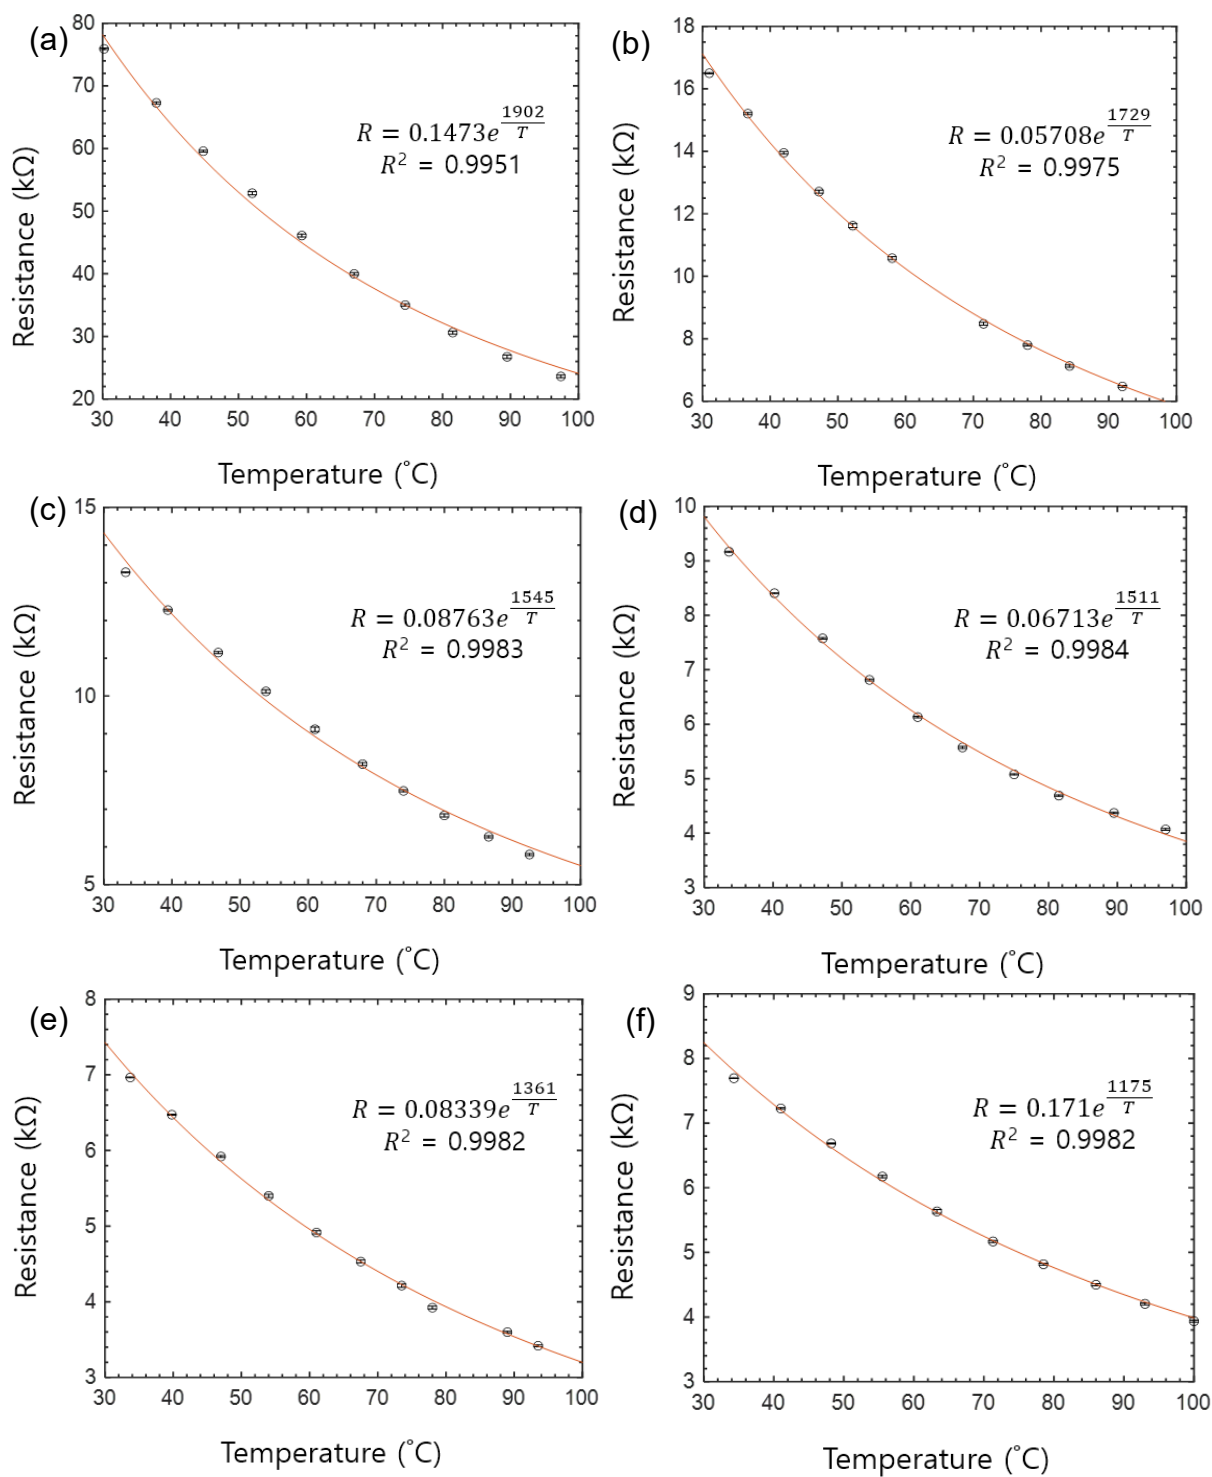

**Figure S11.** Resistance-temperature curves of rGO/SF-sensor-based temperature sensors fabricated with reduction temperatures of (a) 155, (b) 170, (c) 185, (d) 200, (e) 215, and (f) 230 °C.

**Table S1.** Specifications and comparison of some wearable temperature sensors and their performance

| Sensing material      | Sensitivity [%/K] at 300 K | Temp. range [°C] | Method        | Response (recovery) time(s) | Reference |
|-----------------------|----------------------------|------------------|---------------|-----------------------------|-----------|
| rGO                   | 0.63                       | 30–80            | Wet-spinning  | 7 (20)                      | [1]       |
| Crosslinked PEDOT:PSS | 0.77                       | 25–50            | Printing      | 1.5 (6)                     | [2]       |
| rGO/CB                | 0.6                        | 20–60            | Spray-coating | 100                         | [3]       |
| rGO                   | 1.30                       | 25–45            | Spray-coating | 0.33                        | [4]       |
| rGO/PU                | 1.20                       | 30–80            | Wet-spinning  | 7 (70)                      | [5]       |
| GO/PEDOT:PSS          | 1.09                       | 25–100           | Printing      | 18 (32)                     | [6]       |
| rGO-based materials   | 2.77                       | 30–100           | Dip-coating   | 5.5 (5.1)                   | This work |

**Table S2.** Specifications and comparison of some wearable humidity sensors and their performance

| Sensing material    | Sensor type | Sensitivity    | Humid. range [%RH] | Response (recovery) time(s) | Reference |
|---------------------|-------------|----------------|--------------------|-----------------------------|-----------|
| rGO/CB              | Resistance  | 161.16%        | 16–95              | 300 (100)                   | [3]       |
| PDDA/RGO            | Resistance  | 8.69%–37.43%   | 11–97              | 108–147 (94–133)            | [7]       |
| Pt-nRGO             | Resistance  | 4.51%          | 6.1–66.4           | -                           | [8]       |
| GO                  | Capacitance | 3215.25 pF/%RH | 10–90              | 15.8                        | [9]       |
| LIG/GO              | Capacitance | 9150 pF/%RH    | 11–97              | 49 (2)                      | [10]      |
| rGO/ND              | Capacitance | 13086 pF/%RH   | 11–97              | 8 (1.5)                     | [11]      |
| rGO-based materials | Resistance  | 48.28%         | 11–97              | 45 (40)                     | This work |

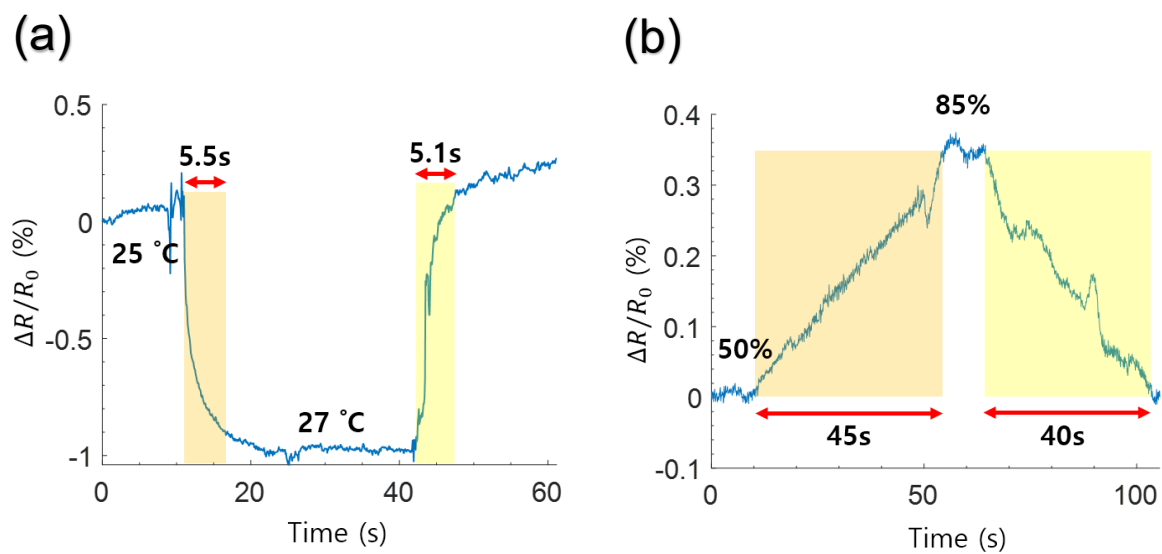

**Figure S12.** Response and recovery curves of the rGO/SF sensor for a reduction temperature of 170 °C: (a) between the temperatures of 25 °C to 27 °C and (b) between relative humidity values of 50% to 85%.

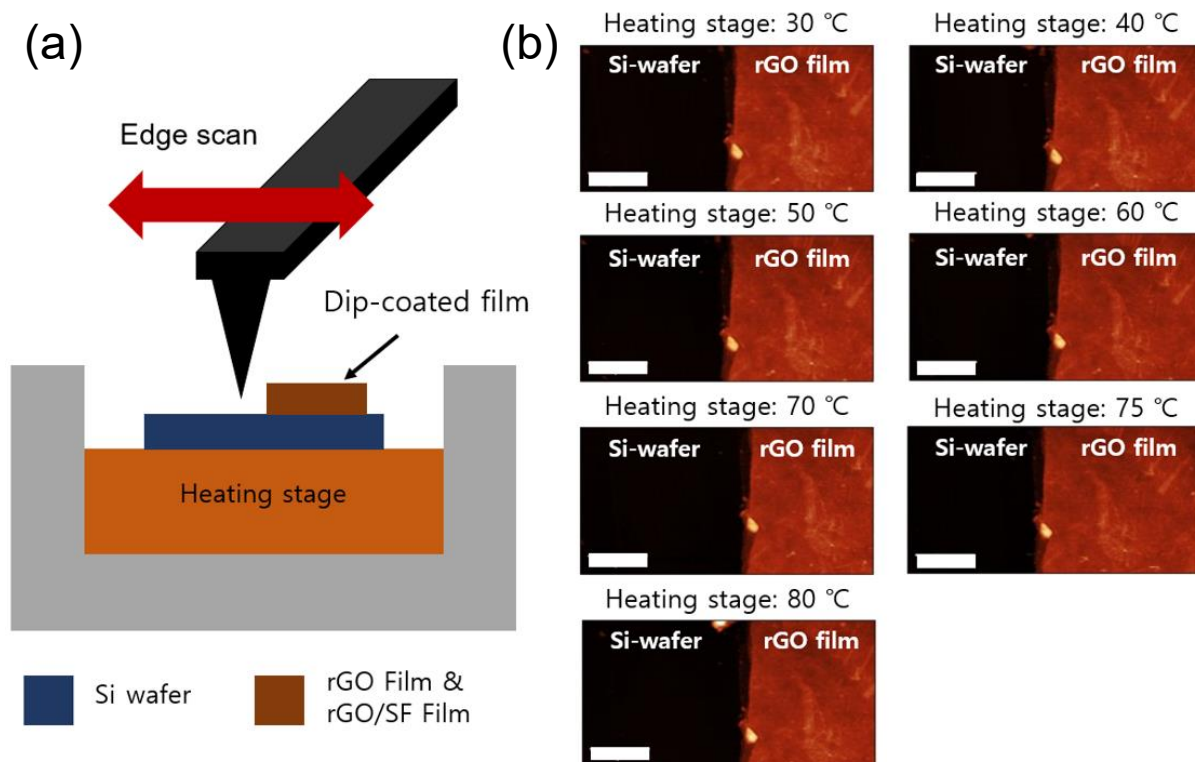

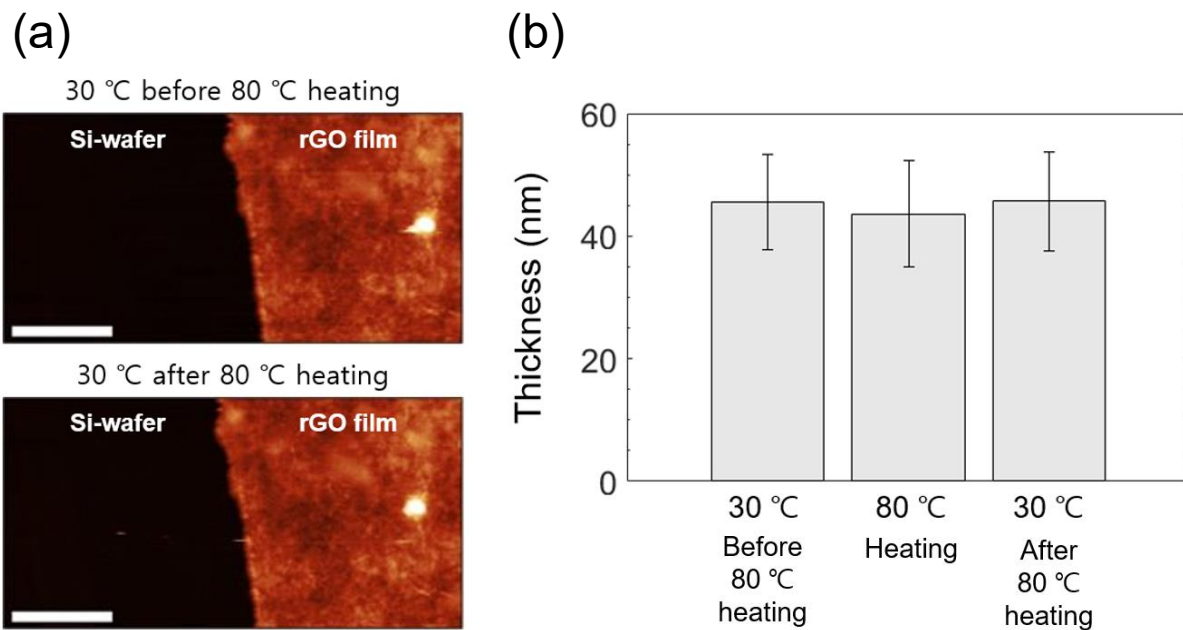

**Figure S14.** (a) AFM images of an rGO film at 30 °C before and after heating the film to 80 °C. (b) Thickness of the rGO film at 30 °C before heating, at 80 °C, and at 30 °C after heating and cooling. All scale bars are 3  $\mu\text{m}$ .



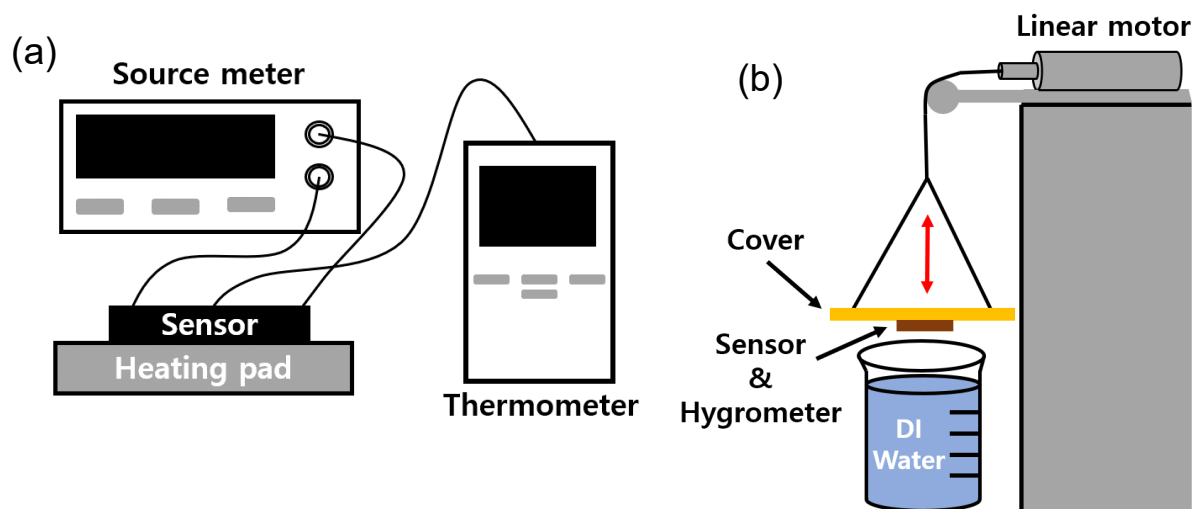

**Figure S15.** Schematic of the measurement methods used for the cyclic responsivity of sensors: (a) varying the temperature and (b) varying the humidity.

(a)

rGO 200 °C: Delamination

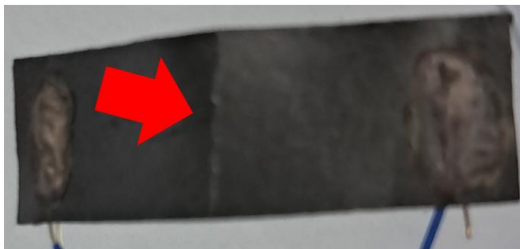

(b)

rGO/SF 200 °C: No delamination

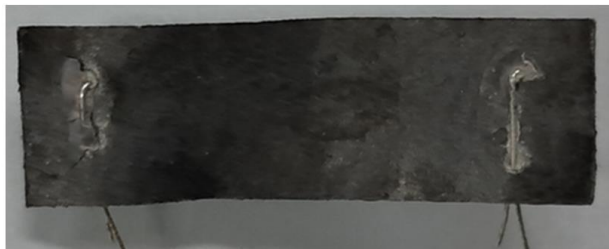

**Figure S16.** (a) Surface of rGO 200 °C and (b) rGO/SF 200 °C after the repeated bending test. The surface of rGO 200 °C was delaminated in the region indicated by the red arrow.

## References

- 
- [1] Trung, T.-Q.; Le, H.-S.; Dang, T.-M.-L.; Ju, S.; Park, S.-Y.; Lee, N.-E. Freestanding, fiber-based, wearable temperature sensor with tunable thermal index for healthcare monitoring. *Adv. Healthc. Mater.*, **2018**, *7*, 1800074.
- [2] Wang, Y.-F.; Sekine, T.; Takeda, Y.; Yokosawa, K.; Matsui, H.; Kumaki, D.; Shiba, T.; Nishikawa, T.; Tokito, S. Fully printed PEDOT: PSS-based temperature sensor with high humidity stability for wireless healthcare monitoring. *Sci. Rep.*, **2020**, *10*, 1.
- [3] Liu, H.; Xiang, H.; Wang, Y.; Li, Z.; Qian, L.; Li, P.; Ma, Y.; Zhou, H.; Huang, W. A flexible multimodal sensor that detects strain, humidity, temperature, and pressure with carbon black and reduced graphene oxide hierarchical composite on paper. *ACS Appl. Mater. Interfaces*, **2019**, *11*, 40613.
- [4] Liu, Q.; Tai, H.; Yuan, Z.; Zhou, Y.; Su, Y.; Jiang, Y. A high-performance flexible temperature sensor composed of polyethyleneimine/reduced graphene oxide bilayer for real-time monitoring. *Adv. Mater. Technol.*, **2019**, *4*, 1800594.
- [5] Trung, T.-Q.; Dang, T.-M.-L.; Ramasundaram, S.; Toi, P.-T.; Park, S.-Y.; Lee, N.-E. A stretchable strain-insensitive temperature sensor based on free-standing elastomeric composite fibers for on-body monitoring of skin temperature. *ACS Appl. Mater. Interfaces*, **2018**, *11*, 2317.
- [6] Soni, M.; Bhattacharjee, M.; Ntagios, M.; Dahiya, R. Printed temperature sensor based on PEDOT:PSS-graphene oxide composite. *IEEE Sens. J.*, **2020**, *20*, 7525.
- [7] Zhang, D.; Tong, J.; Xia, B. Humidity-sensing properties of chemically reduced graphene oxide/polymer nanocomposite film sensor based on layer-by-layer nano self-assembly. *Sens. Actuator B-Chem.*, **2014**, *197*, 66.
- [8] Choi, S. J.; Yu, H.; Jang, J. S.; Kim, M. H.; Kim, S. J.; Jeong, H. S.; Kim, I. D. Nitrogen-doped single graphene fiber with platinum water dissociation catalyst for wearable humidity sensor. *Small*, **2018**, *14*, 1703934.
- [9] Lan, L.; Le, X.; Dong, H.; Xie, J.; Ying, Y.; Ping, J. One-step and large-scale fabrication of flexible and wearable humidity sensor based on laser-induced graphene for real-time tracking of plant transpiration at bio-interface. *Biosens. Bioelectron.*, **2020**, *165*, 112360.
- [10] Zhu, C.; Tao, L. Q.; Wang, Y.; Zheng, K.; Yu, J.; Xiandong, L.; Chen, X.; Huang, Y. Graphene oxide humidity sensor with laser-induced graphene porous electrodes. *Sens. Actuator B-Chem.*, **2020**, *325*, 128790.

---

[11] Yu, X.; Chen, X.; Ding, X.; Chen, X.; Yu, X.; Zhao, X. High-sensitivity and low-hysteresis humidity sensor based on hydrothermally reduced graphene oxide/nanodiamond. *Sens. Actuator B-Chem.*, **2020**, *283*, 761.
